# Supplementary material
Source: PubMed Central journal article supplement (PMC3170926)
Supplement: NIHMS314286-supplement-1_si_001.pdf [file NIHMS314286-supplement-1_si_001.pdf]

**Multivalent Bifunctional Chelator Scaffolds for Gallium-68 Based Positron Emission  
Tomography Imaging Probe Design: Signal Amplification *via* Multivalency**

Ajay N. Singh<sup>1†</sup>, Wei Liu<sup>1,2†</sup>, Guiyang Hao<sup>1</sup>, Amit Kumar<sup>1</sup>, Anjali Gupta<sup>1</sup>, Orhan K. Öz<sup>1</sup>, Jer-Tsong Hsieh<sup>3</sup>, Xiankai Sun<sup>\*1,4</sup>.

Departments of <sup>1</sup>Radiology and <sup>3</sup>Urology, <sup>4</sup>Advanced Imaging Research Center, University of Texas Southwestern Medical Center, Dallas, Texas, USA

<sup>2</sup>State Key Lab of Crystal Materials, Shandong University, Jinan, Shandong, P. R. China

<sup>†</sup> A. Singh and W. Liu contributed equally to this work.

\*Correspondence to Xiankai Sun, Ph.D., Department of Radiology and Advanced Imaging Research Center, University of Texas Southwestern Medical Center at Dallas, 2201 Inwood Road, Texas 75390-8542, USA; E-mail: Xiankai.Sun@UTSouthwestern.edu

## Supporting Information

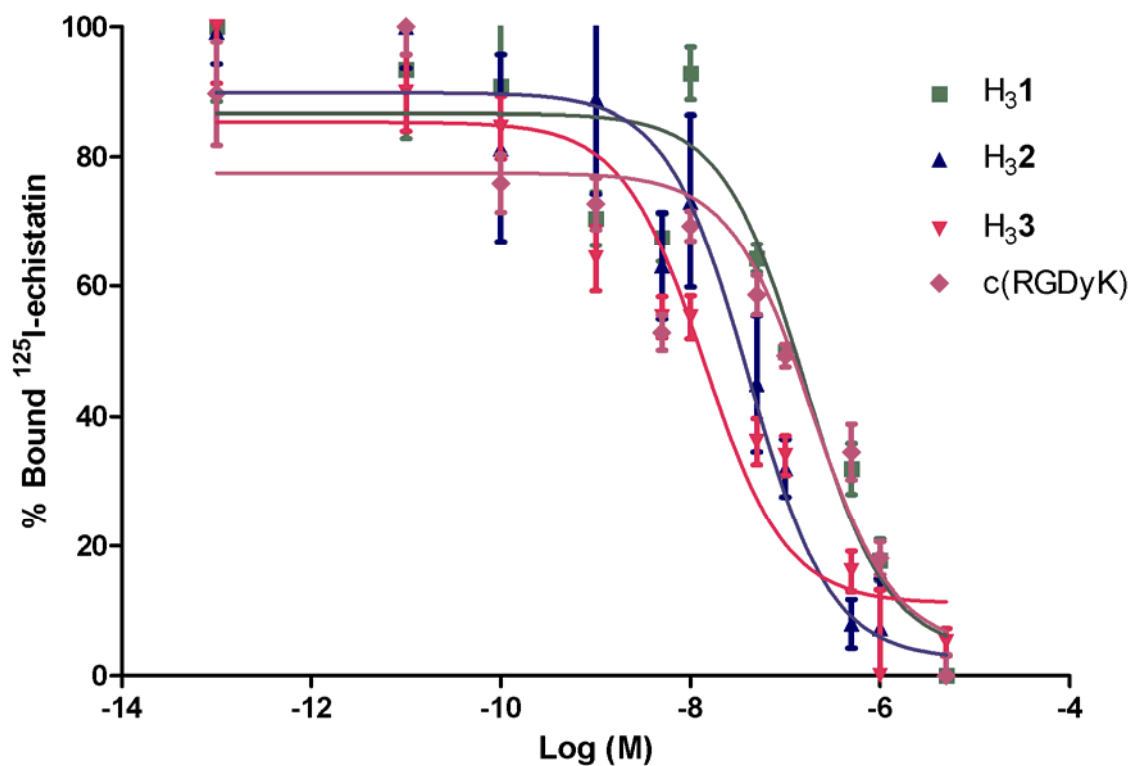

**Figure S1.** The integrin  $\alpha_v\beta_3$  binding affinities of c(RGDyK), H<sub>31</sub>, H<sub>32</sub>, and H<sub>33</sub> measured by a competitive cell-binding assay using <sup>125</sup>I-echistatin as the integrin-specific radioligand. The IC<sub>50</sub> values were calculated to be  $204 \pm 76$  nM,  $171 \pm 60$  nM,  $43.9 \pm 16.1$  nM, and  $14.7 \pm 5.0$  nM for c(RGDyK), H<sub>31</sub>, H<sub>32</sub>, and H<sub>33</sub>, respectively (two-tailed t-test:  $p < 0.01$ ). Goodness of fit ( $R^2$ ): 0.80 – 0.82.

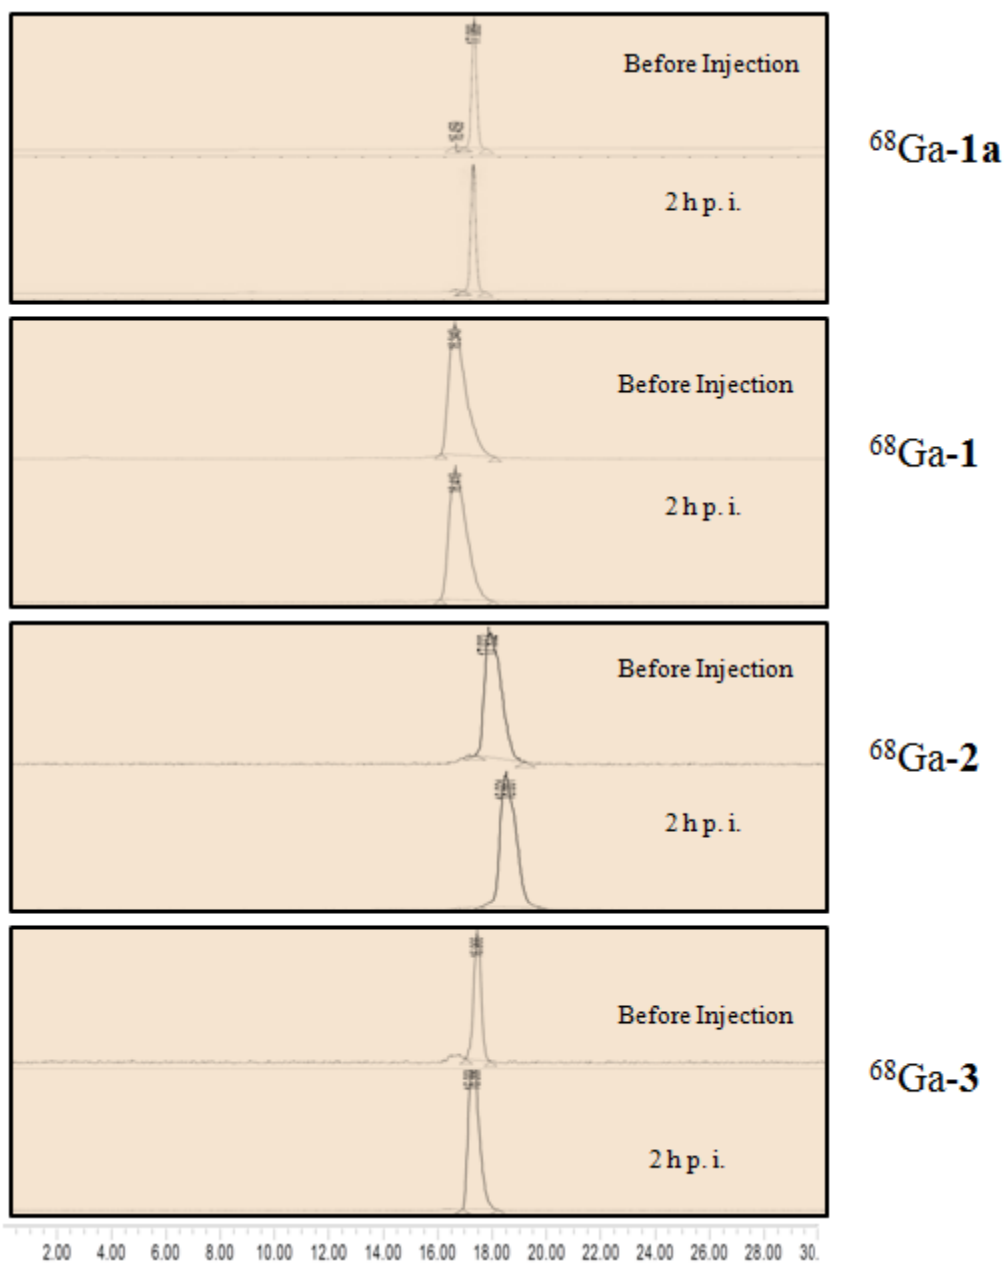

**Figure S2.** Radio-HPLC analysis of the metabolites of  $^{68}\text{Ga-1a}$ ,  $^{68}\text{Ga-1}$ ,  $^{68}\text{Ga-2}$  and  $^{68}\text{Ga-3}$  in mouse urine at 2 h p.i. (n = 4)

**Table S1.** Uptake of  $^{68}\text{Ga-1}$ ,  $^{68}\text{Ga-1a}$ ,  $^{68}\text{Ga-2}$  and  $^{68}\text{Ga-3}$  at 30 min and 2 h p.i. in major organs and tumor determined by quantitative PET imaging analysis. Data are presented as %ID/g  $\pm$  s.d. (n = 3).

| Organ  | $^{68}\text{Ga-1a}$ |                 | $^{68}\text{Ga-1}$ |                 | $^{68}\text{Ga-2}$ |                 | $^{68}\text{Ga-3}$ |                 |
|--------|---------------------|-----------------|--------------------|-----------------|--------------------|-----------------|--------------------|-----------------|
|        | (30 min)            | (2 h)           | (30 min)           | (2 h)           | (30 min)           | (2 h)           | (30 min)           | (2 h)           |
| Tumor  | 3.24 $\pm$ 0.41     | 1.40 $\pm$ 0.36 | 3.26 $\pm$ 0.70    | 1.66 $\pm$ 0.15 | 3.06 $\pm$ 0.21    | 1.90 $\pm$ 0.10 | 3.55 $\pm$ 0.85    | 2.55 $\pm$ 0.50 |
| Heart  | 4.48 $\pm$ 0.74     | 0.86 $\pm$ 0.25 | 3.16 $\pm$ 0.50    | 0.89 $\pm$ 0.17 | 3.44 $\pm$ 0.51    | 0.95 $\pm$ 0.18 | 3.26 $\pm$ 0.81    | 1.14 $\pm$ 0.21 |
| Lung   | 2.76 $\pm$ 0.35     | 0.73 $\pm$ 0.15 | 2.13 $\pm$ 0.30    | 0.73 $\pm$ 0.03 | 2.22 $\pm$ 0.10    | 0.85 $\pm$ 0.19 | 2.6 $\pm$ 0.72     | 1.07 $\pm$ 0.31 |
| Liver  | 3.92 $\pm$ 0.70     | 1.92 $\pm$ 0.71 | 3.16 $\pm$ 0.32    | 2.03 $\pm$ 0.25 | 3.5 $\pm$ 0.55     | 2.04 $\pm$ 0.35 | 3.88 $\pm$ 0.92    | 2.70 $\pm$ 0.39 |
| Kidney | 12.52 $\pm$ 4.0     | 2.34 $\pm$ 0.60 | 9.73 $\pm$ 5.0     | 1.77 $\pm$ 1.01 | 11.22 $\pm$ 3.8    | 2.22 $\pm$ 0.73 | 9.23 $\pm$ 3.78    | 3.90 $\pm$ 1.60 |
| Muscle | 1.03 $\pm$ 0.32     | 0.37 $\pm$ 0.17 | 0.77 $\pm$ 0.63    | 0.51 $\pm$ 0.07 | 0.85 $\pm$ 0.33    | 0.27 $\pm$ 0.13 | 1.34 $\pm$ 0.55    | 0.50 $\pm$ 0.34 |

**Table S2.** Uptake of  $^{68}\text{Ga-1}$ ,  $^{68}\text{Ga-1a}$ ,  $^{68}\text{Ga-2}$  and  $^{68}\text{Ga-3}$  co-injected with c(RGDyK) (10mg/kg) at 30 min and 2 h p.i. in major organs and tumor determined by quantitative PET imaging analysis. Data are presented as %ID/g  $\pm$  s.d. (n = 3).

| Organ  | $^{68}\text{Ga-1a}$ |                 | $^{68}\text{Ga-1}$ |                  | $^{68}\text{Ga-2}$ |                 | $^{68}\text{Ga-3}$ |                 |
|--------|---------------------|-----------------|--------------------|------------------|--------------------|-----------------|--------------------|-----------------|
|        | (30 min)            | (2 h)           | (30 min)           | (2 h)            | (30 min)           | (2 h)           | (30 min)           | (2 h)           |
| Tumor  | 2.40 $\pm$ 0.12     | 0.64 $\pm$ 0.21 | 2.55 $\pm$ 0.32    | 0.3 1 $\pm$ 0.02 | 2.98 $\pm$ 1.5     | 0.44 $\pm$ 0.19 | 1.69 $\pm$ 0.42    | 0.51 $\pm$ 0.15 |
| Heart  | 3.81 $\pm$ 1.00     | 0.55 $\pm$ 0.21 | 4.09 $\pm$ 1.00    | 0.45 $\pm$ 0.02  | 4.33 $\pm$ 3.2     | 0.60 $\pm$ 0.08 | 3.18 $\pm$ 0.04    | 0.77 $\pm$ 0.46 |
| Lung   | 2.14 $\pm$ 0.46     | 0.37 $\pm$ 0.04 | 1.93 $\pm$ 0.37    | 0.30 $\pm$ 0.05  | 2.32 $\pm$ 1.7     | 0.45 $\pm$ 0.43 | 1.70 $\pm$ 0.02    | 0.48 $\pm$ 0.21 |
| Liver  | 2.81 $\pm$ 0.66     | 0.81 $\pm$ 0.10 | 2.89 $\pm$ 0.47    | 0.92 $\pm$ 0.10  | 2.81 $\pm$ 1.9     | 0.93 $\pm$ 0.75 | 2.23 $\pm$ 0.00    | 0.91 $\pm$ 0.26 |
| Kidney | 6.92 $\pm$ 3.17     | 1.95 $\pm$ 0.33 | 9.97 $\pm$ 5.61    | 1.55 $\pm$ 0.77  | 8.26 $\pm$ 7.2     | 1.54 $\pm$ 0.40 | 7.09 $\pm$ 2.53    | 3.40 $\pm$ 1.52 |
| Muscle | 1.49 $\pm$ 0.11     | 0.22 $\pm$ 0.05 | 1.51 $\pm$ 0.20    | 0.15 $\pm$ 0.04  | 1.77 $\pm$ 0.97    | 0.17 $\pm$ 0.04 | 1.31 $\pm$ 0.02    | 0.35 $\pm$ 0.18 |

**Table S3.** Biodistribution data of  $^{68}\text{Ga-1}$ ,  $^{68}\text{Ga-1a}$ ,  $^{68}\text{Ga-2}$  and  $^{68}\text{Ga-3}$  at 30 min and 2 h p.i. in major organs and tumor. Data are presented as %ID/g  $\pm$  s.d. (n = 3) (S. Int.: Small intestines; L. Int = Large intestines).

| Organ   | $^{68}\text{Ga-1a}$ |                 | $^{68}\text{Ga-1}$ |                 | $^{68}\text{Ga-2}$ |                 | $^{68}\text{Ga-3}$ |                 |
|---------|---------------------|-----------------|--------------------|-----------------|--------------------|-----------------|--------------------|-----------------|
|         | (30min)             | (2 h)           | (30min)            | (2 h)           | (30min)            | (2 h)           | (30min)            | (2 h)           |
| Tumor   | 2.84 $\pm$ 0.24     | 1.63 $\pm$ 0.19 | 3.04 $\pm$ 0.24    | 1.67 $\pm$ 0.16 | 3.16 $\pm$ 0.22    | 1.94 $\pm$ 0.32 | 5.58 $\pm$ 0.45    | 4.41 $\pm$ 1.00 |
| Blood   | 1.31 $\pm$ 0.11     | 0.16 $\pm$ 0.06 | 1.43 $\pm$ 0.25    | 0.23 $\pm$ 0.03 | 1.24 $\pm$ 0.09    | 0.51 $\pm$ 0.60 | 1.21 $\pm$ 0.28    | 0.18 $\pm$ 0.00 |
| Heart   | 1.00 $\pm$ 0.07     | 0.47 $\pm$ 0.21 | 0.96 $\pm$ 0.25    | 0.50 $\pm$ 0.05 | 1.08 $\pm$ 0.02    | 0.55 $\pm$ 0.08 | 1.78 $\pm$ 0.23    | 1.00 $\pm$ 0.14 |
| Lung    | 2.74 $\pm$ 0.11     | 1.24 $\pm$ 0.42 | 2.62 $\pm$ 0.24    | 1.25 $\pm$ 0.13 | 2.93 $\pm$ 0.10    | 1.31 $\pm$ 0.15 | 5.29 $\pm$ 1.25    | 2.94 $\pm$ 0.12 |
| Liver   | 1.98 $\pm$ 0.29     | 1.43 $\pm$ 0.53 | 1.91 $\pm$ 0.30    | 1.72 $\pm$ 0.09 | 2.07 $\pm$ 0.05    | 1.80 $\pm$ 0.14 | 3.10 $\pm$ 0.77    | 2.81 $\pm$ 0.26 |
| Spleen  | 2.66 $\pm$ 0.94     | 2.10 $\pm$ 1.08 | 3.17 $\pm$ 0.70    | 2.55 $\pm$ 0.84 | 2.44 $\pm$ 0.54    | 2.78 $\pm$ 0.19 | 3.42 $\pm$ 0.91    | 3.14 $\pm$ 0.20 |
| Kidney  | 6.25 $\pm$ 0.61     | 2.95 $\pm$ 0.76 | 5.40 $\pm$ 0.61    | 3.14 $\pm$ 0.13 | 3.18 $\pm$ 2.76    | 3.86 $\pm$ 1.80 | 8.41 $\pm$ 0.99    | 7.50 $\pm$ 0.95 |
| Fat     | 0.40 $\pm$ 0.21     | 0.42 $\pm$ 0.09 | 1.34 $\pm$ 0.74    | 0.45 $\pm$ 0.04 | 0.66 $\pm$ 0.28    | 0.39 $\pm$ 0.08 | 1.08 $\pm$ 0.51    | 0.61 $\pm$ 0.42 |
| Bone    | 0.97 $\pm$ 0.17     | 0.44 $\pm$ 0.09 | 0.94 $\pm$ 0.05    | 0.52 $\pm$ 0.06 | 0.91 $\pm$ 0.81    | 0.37 $\pm$ 0.21 | 1.23 $\pm$ 0.10    | 1.00 $\pm$ 0.24 |
| Muscle  | 0.70 $\pm$ 0.10     | 0.42 $\pm$ 0.14 | 0.62 $\pm$ 0.02    | 0.30 $\pm$ 0.03 | 0.91 $\pm$ 0.73    | 0.41 $\pm$ 0.27 | 1.57 $\pm$ 0.24    | 1.17 $\pm$ 0.31 |
| Brain   | 0.08 $\pm$ 0.01     | 0.05 $\pm$ 0.00 | 0.07 $\pm$ 0.01    | 0.06 $\pm$ 0.01 | 0.06 $\pm$ 0.02    | 0.06 $\pm$ 0.02 | 0.13 $\pm$ 0.01    | 0.10 $\pm$ 0.03 |
| S.Int   | 2.01 $\pm$ 0.18     | 2.39 $\pm$ 0.88 | 2.01 $\pm$ 0.22    | 2.20 $\pm$ 0.28 | 2.01 $\pm$ 0.19    | 1.59 $\pm$ 0.15 | 3.97 $\pm$ 0.30    | 3.14 $\pm$ 0.69 |
| L.Int   | 0.84 $\pm$ 0.03     | 0.92 $\pm$ 0.08 | 1.04 $\pm$ 0.10    | 0.98 $\pm$ 0.24 | 1.07 $\pm$ 0.68    | 1.40 $\pm$ 0.19 | 1.96 $\pm$ 0.17    | 1.60 $\pm$ 0.65 |
| Stomach | 0.82 $\pm$ 0.33     | 1.83 $\pm$ 0.18 | 0.75 $\pm$ 0.07    | 0.99 $\pm$ 0.11 | 0.59 $\pm$ 0.02    | 1.20 $\pm$ 0.34 | 3.36 $\pm$ 0.43    | 1.86 $\pm$ 0.61 |
